# Supplementary material for: The Impact of War on Access to Specialist Care for Patients with Chronic Diseases in Sudan: A Cross-Sectional Study
Source: Research Square preprint supplement (doi:10.21203/rs.3.rs-6379267/v1), 2025-05-07
Supplement: Supplementary file 1 [file b02a0e2d50d7f2fc3f161dbf.pdf]

## **Annex:**

### **Questionnaire:**

#### **Informed consent:**

I have read and I understand the provided information and have had the opportunity to ask questions.

I understand what the aim of this research and I understand the benefits of this research, and I understand that this information may be published and I agree with that, and I know there's will not be any material return of my participation.

I understand that my participation is voluntary and that I am free to withdraw at any time, without giving a reason and without cost.

Participant's signature \_\_\_\_\_ Date \_\_\_\_\_

Investigator's signature \_\_\_\_\_ Date \_\_\_\_\_

Dear Participant,

Your Consent on answering this questionnaire is very appreciated. We are conducting this survey to identify the level of acceptance and knowledge about deceased organ donation and related factors.

All the information collected is anonymous and confidential.

**Do you consent to participate in this study? \***

Yes

No

**Gender:**

Male

Female

**Age:**

18-24 years

25-34 years

35-44 years

45-54 years

55 years and more

**From which of the following areas were you displaced?**

Khartoum State

Jazeera State

Other: .....

**Residence area:**

Shendi

Dongola

**After displacement, where do you live now?**

Owned house

Rented house

With relatives

Displaced camp

**Educational level:**

No formal education

Primary school

High school

Higher degrees

**Employment status:**

Government employee

Non-government employee

Housewife

Student

Freelancer

**What are your chronic diseases?**

Hypertension

Diabetes

Heart disease

Thyroid disease

Asthma

Other: .....

**How long you have been suffering from the disease?**

6-12 months

1-5 years

6-10 years

More than 10 years

**How often do you seek medical care for your chronic illness?**

Never

Rarely (once a year)

Sometimes (every few months)

Usually (monthly)

**Estimated, how far is the nearest healthcare facility from where you live?**

Less than 5 km

5-10 km

11-20 km

More than 20 km

**How convenient is there transportation to healthcare facilities?**

Not available at all

Available from time to time

Available but infrequently

Easy to access

**Are you currently receiving treatment for your chronic illness?**

Yes

No

**Have you seen a specialist for example nurse, doctor or any other health-care professional for your chronic Diseases the past six months?**

Yes

No

**Has the ongoing war affected your access to healthcare?**

Yes

No

**Did you experience any interruptions in your treatment due to war?**

Yes

No

**What are the biggest obstacles you face when seeking specialized care during the war?**

Distance to healthcare facilities

The cost of treatment is expensive

Lack of medical staff or specialist

Security concern

Other: .....

**Suggestions to improve access to healthcare?**

Increasing the number of medical personnel

Improving tran

Increasing availability of essential medical supplies

Implementation of telemedicine service (via internet)

Increasing cooperation between health organizations and communities

Other: .....

**Thank you**
